# Supplementary material for: Efficient retina formation requires suppression of both Activin and BMP signaling pathways in pluripotent cells
Source: PubMed Central journal article supplement (PMC4400599; doi:10.1242/bio.20149977), 2015-03-06
Supplement: supp_bio.20149977_bio.20149977-s1.pdf [file supp_bio.20149977_bio.20149977-s1.pdf]

Supplementary Material

Kimberly A. Wong et al. doi: 10.1242/bio.20149977

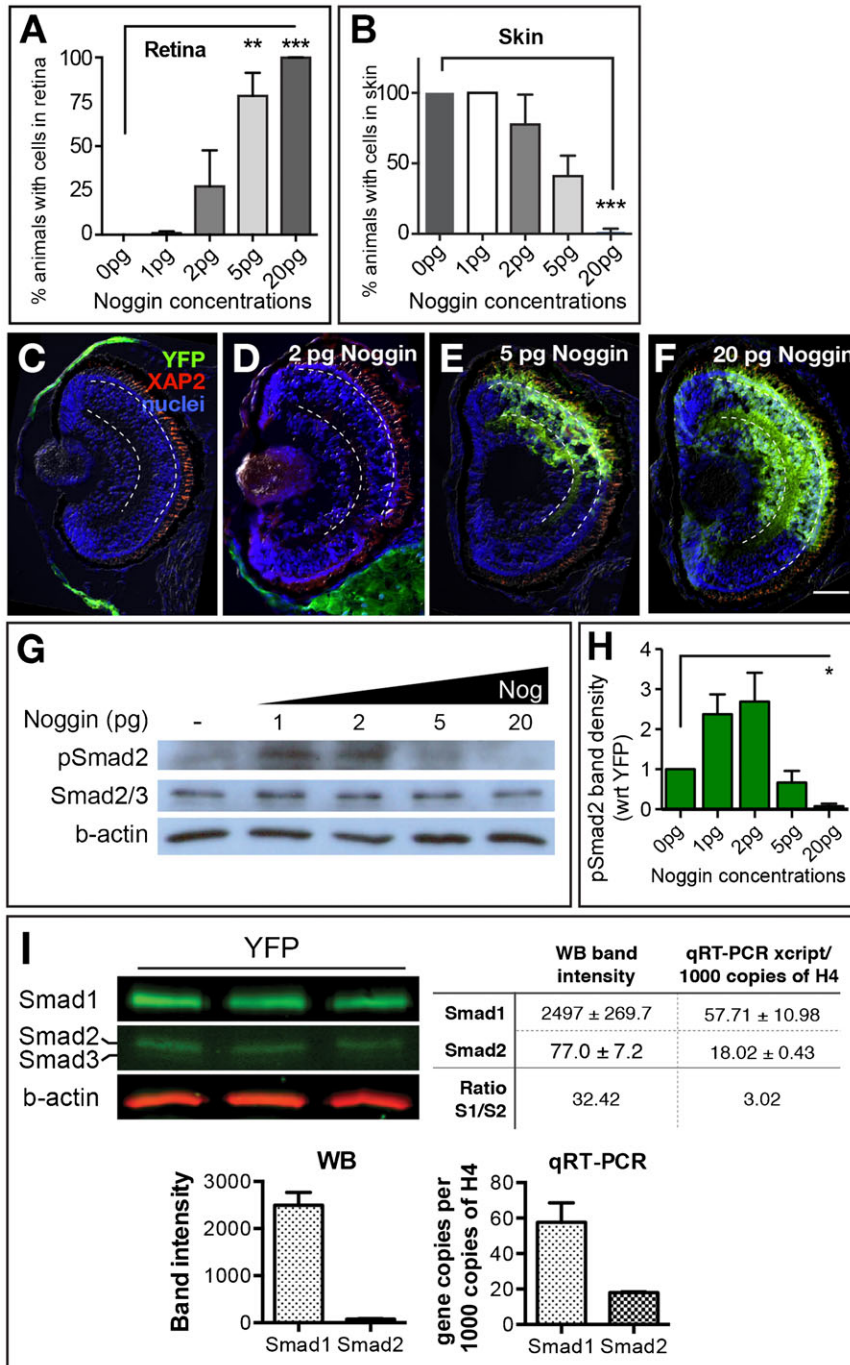

**Fig. S1. Effect of increasing concentration of Noggin increases efficiency of retina formation while blocking Activin pathway signaling.** (A–F) The ACT assay was conducted with donor tissue from embryos injected with increasing concentrations of Noggin RNA. (A) Animal cap cells injected with 5 and 20 pg of Noggin (and 500 pg YFP RNA as a tracer) form retina in nearly all animals (75 and 100%). (B) Conversely, the percentage of animals with transplanted YFP+ cells forming skin decreases with higher concentration of Noggin. (C–F) Representative sections from each experimental condition. Green, YFP; red, rod photoreceptor marker, XAP2; blue, DAPI staining. Noggin titer: YFP,  $n=60$ ; 1 pg,  $n=65$ ; 2 pg,  $n=63$ ; 5 pg,  $n=65$ ; 20 pg,  $n=61$ ;  $N=3$ . Scale bar, 50  $\mu$ m. (G,H) Western blot analysis of endogenous pSmad2 activity in animal caps injected with 0 to 20 pg of Noggin RNA. Low Noggin concentrations (1–2 pg) results in a slight boost in signal, while 5 and 20 pg represses pSmad2 ( $N=3$ ). (I) Smad2 protein and mRNA is present in untreated animal caps, but at a lower concentration than Smad1. Quantitative fluorescent western blot analysis for Smad1 and Smad2/3 in animal caps injected with YFP, normalized to  $\beta$ -actin control. All three biological replicates are shown. Transcript was extracted from untreated animal caps for qRT-PCR analysis. Absolute quantification of *smad1* and *smad2* mRNA transcripts (xcripts) are represented 'per 1000 copies of H4 gene'. This was measured by standard curve method, using a known quantity of a sequenced plasmid template. All analysis conducted on each sample twice in three biological replicates.

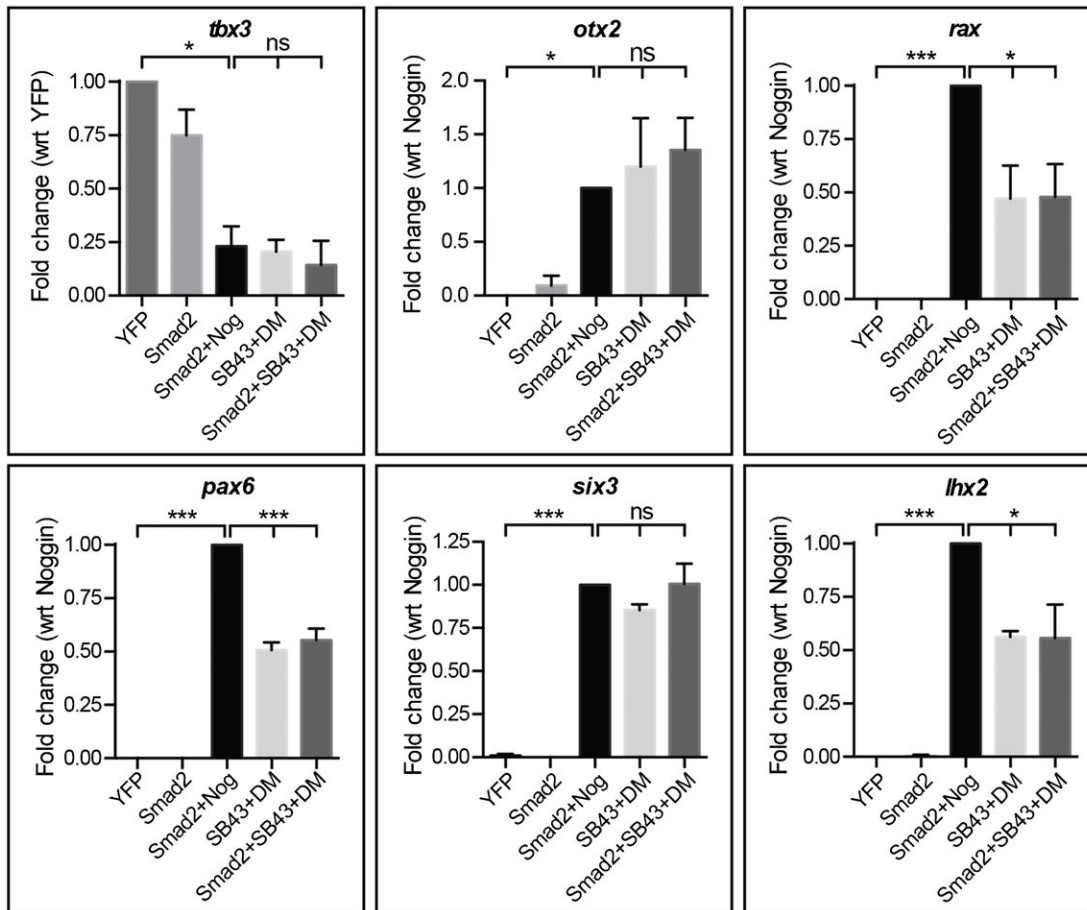

**Fig. S2. Reproducible expression of EFTF by treatment with Noggin or SB43+DM.** Densitometric analysis of ChemiDoc gel images (BioRad) of PCR reactions for the EFTFs shown in Fig. 5 using primer pairs listed in supplementary material Table S3. Samples were normalized to histone H4. Biological replicates: *tbx3*, *N*=3; *otx2*, *N*=3; *rax*, *N*=3; *pax6*, *N*=3; *six3*, *N*=3; *lhx2*, *N*=2.

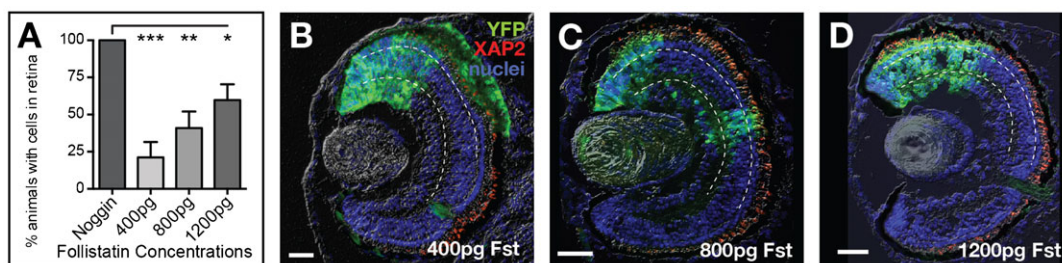

**Fig. S3. Effect of increasing concentration of Follistatin in ACT assay.** (A) Animal caps were injected with 400, 800, or 1200 pg of Follistatin RNA with YFP RNA. Increasing the amount of injected Follistatin RNA increased the ratio of animals showing successful retinal integration from approximately 20% to 60%. However, compared to Noggin (*n*=80), there were still significantly fewer animals with transplanted cells in the retina. Higher concentrations of Follistatin caused cell death in animal caps. (B–D) Representative sections from each experimental condition. Follistatin titer: 400 pg, *n*=79; 800 pg, *n*=84; 1200 pg, *n*=60; *N*=3. Scale bars, 50 μm. Error bars = ±s.e.m.; \**p*<0.05; \*\**p*<0.01; \*\*\**p*<0.001.

**Table S1. Antibodies used for western blots and IHC**

| Antibody                                        | Source                               | Concentration | Catalog number |
|-------------------------------------------------|--------------------------------------|---------------|----------------|
| Mouse anti-XAP2                                 | Developmental Studies Hybridoma Bank | 1:25          | Clone 5B9      |
| Rabbit anti-GFP                                 | Molecular Probes (Invitrogen)        | 1:1000        | A11122         |
| DAPI (49,6-Diamidino-2-phenylindole, dilactate) | Sigma                                | 10 mg/ml      | D9564          |
| Rabbit anti-phospho-Smad1/5/8 (C-term)          | Cell Signaling Technology            | 1:1000        | 9511           |
| Rabbit anti-Smad1                               | Cell Signaling Technology            | 1:1000–2000   | 9743           |
| Rabbit anti-phospho-Smad2                       | Cell Signaling Technology            | 1:500         | 3108           |
| Rabbit anti-Smad2/3                             | Cell Signaling Technology            | 1:1000–2000   | 5678           |
| Rabbit anti-Phospho-p38 MAPK (Thr180/Tyr182)    | Cell Signaling Technology            | 1:500         | 9211           |
| Rabbit anti-p38 MAPK                            | Cell Signaling Technology            | 1:500         | 9212           |
| Rabbit anti- $\beta$ -actin                     | Cell Signaling Technology            | 1:2000        | 4967           |
| Goat anti-rabbit IgG HRP                        | Fisher                               | 1:5000        | PI-31460       |
| Alexa 488 donkey anti-rabbit IgG                | Molecular Probes (Invitrogen)        | 1:1000        | A21206         |
| Alexa 594 goat anti-mouse IgG3                  | Molecular Probes (Invitrogen)        | 1:1000        | A21155         |
| Mouse anti-beta-actin                           | Li-Cor                               | 1:4000        | 926-42212      |
| IR Dye 800CW goat anti-rabbit                   | Li-Cor                               | 1:15,000      | 827-08365      |
| IR Dye 680RD goat anti-mouse                    | Li-Cor                               | 1:15,000      | 926-68170      |

**Table S2. Constructs used to generate RNA for experiments or for qPCR standards**

| Construct                                                          | Linearized with | Reference                                                          |
|--------------------------------------------------------------------|-----------------|--------------------------------------------------------------------|
| XBmp4-b+pCS2+                                                      | PspOMI          | This study                                                         |
| XCerberus+pCS2+                                                    | PspOMI          | EXRC; XB-CLONE-8773700                                             |
| XFollistatin+pSP64T                                                | XbaI            | EXRC; XB-CLONE-12442174                                            |
| Dominant-negative BMP receptor type II (tBRII) +pCS2               | NotI            | (Frisch and Wright, 1998)                                          |
| Dominant-negative activin receptor type II ( $\Delta$ XAR1)+pSP64T | EcoRI           | Addgene catalog number 17005; (Hemmati-Brivanlou and Melton, 1992) |
| mSmad1-AVA+pCS2+                                                   | NotI            | (Nojima et al., 2010)                                              |
| XSmad2+pCS2R                                                       | NotI            | This study                                                         |
| XSmad2-P445H+pCS2R                                                 | NotI            | This study, (Eppert et al., 1996)                                  |
| XNoggin+pCS2+                                                      | NotI            | (Smith and Harland, 1992)                                          |
| VenusEYFP+pCS2+                                                    | NotI            | (Nagai et al., 2002)                                               |
| xH4+pGEMTez                                                        |                 | This study                                                         |
| xSmad1_frag+pGEMTez                                                |                 | This study                                                         |
| xSmad2_frag+pGEMTez                                                |                 | This study                                                         |

**Table S3. RT-PCR primers**

| Target | Upstream primer (5'–3')  | Downstream primer (5'–3') | Reference            | Cycles |
|--------|--------------------------|---------------------------|----------------------|--------|
| pax6   | GCAACCTGGCGAGCGATAAGC    | CCTGGCGTCTCTGGTTCGTA      | (Zuber et al., 2003) | 30     |
| tbx3   | CCTATCCTTGACTTGCTACA     | GTTTTGGGGAAGGAGGGTAT      | (Zuber et al., 2003) | 27     |
| rax    | CCCCAACAGGAGCATTAGAAGAC  | AGGGCACTCATGGCAGAAGGTT    | (Zuber et al., 2003) | 28     |
| six3   | TTGTCTGTCTGTCTCTTGTT     | TTCTGTGTTTGGTTTATCTC      | (Zuber et al., 2003) | 33     |
| lhx2   | CCGGAGATGCTTTCCACAG      | GTAAGCTCCGACTCCAGGTT      | This study           | 30     |
| otx2   | CTGTCCAAGCTCACATACTAACA  | CAGAGGTAGTCAGGCTGAGC      | This study           | 40     |
| ncam   | CACAGTTCACCAAATGC        | GGAATCAAGCGGTACAGA        | (Zuber et al., 2003) | 37     |
| noggin | CCAGACCTTCTGTCTGT        | AGTCCAAGAGTCTCAGCA        | (Zuber et al., 2003) | 43     |
| xbra   | CAGTTCATAGCAGTGACCGC     | GGCGAACATAATGACCCACC      | This study           | 25     |
| xk81   | TCTCGCTTCTACCTGGAGA      | CCATTTCCAGCCTGGTCTTA      | This study           | 26     |
| h4     | CGGGATAACATTCAGGGTATCACT | ATCCATGGCGGTAACGTCTTCCT   | (Zuber et al., 2003) | 26     |
| xsmad1 | TCCACCATGGTTTTTCATCCT    | CATCCTGCCGATGATATTCC      | This study           |        |
| xsmad2 | GAGAAGTGGTGCGAAAAAGC     | GAAGCTGTAAAGGCCTGTGG      | This study           |        |
